# Supplementary material for: Cross-National Disparities in End-of-Life Outcomes and Care Strategies for Parkinson's Disease: A Systematic Review and Meta-Analysis of China and the United States
Source: Research Square preprint supplement (doi:10.21203/rs.3.rs-8124753/v1), 2026-01-12
Supplement: Supplementary file 1 [file TAB 2.docx]

TAB 2

<!DOCTYPE html>

<html>

<head>

<meta charset="UTF-8">

<title>Supplementary Table S2: Complete Search Strategy</title>

<style>

body {

font-family: 'Times New Roman', Times, serif;

margin: 40px;

line-height: 1.6;

}

h1 {

font-size: 16pt;

font-weight: bold;

text-align: center;

margin-bottom: 30px;

}

h2 {

font-size: 14pt;

font-weight: bold;

margin-top: 30px;

margin-bottom: 15px;

border-bottom: 2px solid #333;

padding-bottom: 5px;

}

table {

width: 100%;

border-collapse: collapse;

margin-bottom: 30px;

font-size: 10pt;

}

th {

background-color: #2C3E50;

color: white;

padding: 12px;

text-align: left;

font-weight: bold;

border: 1px solid #ddd;

}

td {

padding: 10px;

border: 1px solid #ddd;

vertical-align: top;

}

tr:nth-child(even) {

background-color: #f9f9f9;

}

tr:hover {

background-color: #f5f5f5;

}

.note {

font-size: 9pt;

font-style: italic;

color: #555;

margin-top: 10px;

padding: 10px;

background-color: #fffacd;

border-left: 4px solid #ffd700;

}

.database-name {

font-weight: bold;

color: #2C3E50;

}

.search-string {

font-family: 'Courier New', monospace;

background-color: #f0f0f0;

padding: 5px;

border-radius: 3px;

}

</style>

</head>

<body>

<h1>Supplementary Table S2: Complete Search Strategy for Systematic Review<br>

Cross-National Disparities in End-of-Life Outcomes and Care Strategies for Parkinson's Disease</h1>

<div class="note">

<strong>Note:</strong> This table provides the complete, reproducible search strategies used across all six databases

(4 English-language and 2 Chinese-language databases) from January 1, 2015, to October 31, 2025.

All searches were conducted between October 15-20, 2025. Search strategies were developed in consultation

with a medical librarian and piloted to optimize sensitivity and specificity.

</div>

<h2>A. English-Language Databases</h2>

<table border="1" class="dataframe data-table">

<thead>

<tr style="text-align: right;">

<th>Database</th>

<th>Search Component</th>

<th>Search String</th>

<th>Filters Applied</th>

</tr>

</thead>

<tbody>

<tr>

<td>PubMed/MEDLINE</td>

<td>Disease Terms</td>

<td>"Parkinson disease"[MeSH] OR "Parkinson's disease"[tiab] OR "Parkinsonism"[tiab] OR PD[tiab]</td>

<td>Date: 2015/01/01-2025/10/31; Language: English; Humans</td>

</tr>

<tr>

<td>PubMed/MEDLINE</td>

<td>Stage/Setting Terms</td>

<td>"end-of-life"[tiab] OR "end of life"[tiab] OR "terminal"[tiab] OR "advanced"[tiab] OR "late-stage"[tiab] OR "palliative care"[MeSH] OR "hospice care"[MeSH] OR "Hoehn-Yahr stage 4"[tiab] OR "Hoehn-Yahr stage 5"[tiab]</td>

<td></td>

</tr>

<tr>

<td>PubMed/MEDLINE</td>

<td>Outcome Terms</td>

<td>"quality of life"[MeSH] OR QoL[tiab] OR "survival"[tiab] OR "mortality"[MeSH] OR "caregiver burden"[tiab] OR "rehabilitation"[MeSH] OR "physical therapy"[tiab] OR "costs and cost analysis"[MeSH] OR "health policy"[MeSH] OR "health equity"[MeSH] OR "telemedicine"[MeSH] OR "telehealth"[tiab] OR "digital health"[tiab]</td>

<td></td>

</tr>

<tr>

<td>PubMed/MEDLINE</td>

<td>Geographic Terms</td>

<td>"China"[MeSH] OR "Chinese"[tiab] OR "United States"[MeSH] OR "US"[tiab] OR "USA"[tiab] OR "America"[tiab]</td>

<td>Combined with AND operator</td>

</tr>

<tr>

<td>Embase</td>

<td>Disease Terms</td>

<td>'parkinson disease'/exp OR 'parkinson*':ti,ab OR 'parkinsonism'/exp OR 'pd':ti,ab</td>

<td>Date: 2015/01/01-2025/10/31; Language: English; Human</td>

</tr>

<tr>

<td>Embase</td>

<td>Stage/Setting Terms</td>

<td>'end-of-life':ti,ab OR 'terminal care'/exp OR 'palliative therapy'/exp OR 'hospice care'/exp OR 'advanced stage':ti,ab OR 'late-stage':ti,ab OR 'hoehn-yahr':ti,ab</td>

<td></td>

</tr>

<tr>

<td>Embase</td>

<td>Outcome Terms</td>

<td>'quality of life'/exp OR 'qol':ti,ab OR 'survival'/exp OR 'mortality'/exp OR 'caregiver burden':ti,ab OR 'rehabilitation'/exp OR 'physiotherapy'/exp OR 'health care cost'/exp OR 'health policy'/exp OR 'health disparity'/exp OR 'telemedicine'/exp OR 'telehealth':ti,ab</td>

<td></td>

</tr>

<tr>

<td>Embase</td>

<td>Geographic Terms</td>

<td>'china'/exp OR 'chinese':ti,ab OR 'united states'/exp OR 'us':ti,ab OR 'usa':ti,ab OR 'america':ti,ab</td>

<td>Combined with AND operator</td>

</tr>

<tr>

<td>Scopus</td>

<td>Disease Terms</td>

<td>TITLE-ABS-KEY("Parkinson* disease" OR "Parkinsonism" OR "PD")</td>

<td>Date: 2015-2025; Language: English</td>

</tr>

<tr>

<td>Scopus</td>

<td>Stage/Setting Terms</td>

<td>TITLE-ABS-KEY("end-of-life" OR "terminal" OR "advanced" OR "late-stage" OR "palliative" OR "hospice" OR "Hoehn-Yahr")</td>

<td></td>

</tr>

<tr>

<td>Scopus</td>

<td>Outcome Terms</td>

<td>TITLE-ABS-KEY("quality of life" OR "QoL" OR "survival" OR "mortality" OR "caregiver burden" OR "rehabilitation" OR "cost*" OR "economic burden" OR "health policy" OR "disparity" OR "telemedicine" OR "telehealth")</td>

<td>Combined with AND operator; Country: China OR United States</td>

</tr>

<tr>

<td>Web of Science</td>

<td>Disease Terms</td>

<td>TS=("Parkinson* disease" OR "Parkinsonism" OR "PD")</td>

<td>Date: 2015-2025; Language: English</td>

</tr>

<tr>

<td>Web of Science</td>

<td>Stage/Setting Terms</td>

<td>TS=("end-of-life" OR "terminal" OR "advanced" OR "late-stage" OR "palliative" OR "hospice" OR "Hoehn-Yahr")</td>

<td></td>

</tr>

<tr>

<td>Web of Science</td>

<td>Outcome Terms</td>

<td>TS=("quality of life" OR "QoL" OR "survival" OR "mortality" OR "caregiver burden" OR "rehabilitation" OR "cost*" OR "health policy" OR "disparity" OR "inequality" OR "telemedicine" OR "telehealth")</td>

<td>Combined with AND operator; Country: China OR United States</td>

</tr>

</tbody>

</table>

<div class="note">

<strong>Boolean Logic:</strong> All search components within each database were combined using the AND operator.

Within each component, individual terms were combined with OR. The final search formula was:

(Disease Terms) AND (Stage/Setting Terms) AND (Outcome Terms) AND (Geographic Terms).

</div>

<h2>B. Chinese-Language Databases</h2>

<table border="1" class="dataframe data-table">

<thead>

<tr style="text-align: right;">

<th>Database (数据库)</th>

<th>Search Component (检索组块)</th>

<th>Chinese Search String (中文检索式)</th>

<th>English Translation</th>

<th>Filters Applied (筛选条件)</th>

</tr>

</thead>

<tbody>

<tr>

<td>CNKI (中国知网)</td>

<td>Disease Terms (疾病术语)</td>

<td>主题="帕金森病" OR 主题="帕金森" OR 主题="震颤麻痹" OR 主题="PD"</td>

<td>Subject="Parkinson's disease" OR Subject="Parkinson" OR Subject="paralysis agitans" OR Subject="PD"</td>

<td>Date: 2015-2025; Document Type: Journal Article (期刊论文)</td>

</tr>

<tr>

<td>CNKI (中国知网)</td>

<td>Stage/Setting Terms (分期/情境术语)</td>

<td>主题="终末期" OR 主题="晚期" OR 主题="临终关怀" OR 主题="姑息治疗" OR 主题="安宁疗护" OR 主题="生命末期"</td>

<td>Subject="end-of-life" OR Subject="late-stage" OR Subject="hospice care" OR Subject="palliative care" OR Subject="hospice" OR Subject="end of life"</td>

<td></td>

</tr>

<tr>

<td>CNKI (中国知网)</td>

<td>Outcome Terms (结局术语)</td>

<td>主题="生活质量" OR 主题="生存" OR 主题="死亡率" OR 主题="护理负担" OR 主题="照护者" OR 主题="康复" OR 主题="物理治疗" OR 主题="经济负担" OR 主题="医疗费用" OR 主题="卫生政策" OR 主题="健康差异" OR 主题="远程医疗" OR 主题="数字健康"</td>

<td>Subject="quality of life" OR Subject="survival" OR Subject="mortality" OR Subject="caregiver burden" OR Subject="caregiver" OR Subject="rehabilitation" OR Subject="physical therapy" OR Subject="economic burden" OR Subject="medical costs" OR Subject="health policy" OR Subject="health disparity" OR Subject="telemedicine" OR Subject="digital health"</td>

<td>Combined with AND operator (组间用AND连接)</td>

</tr>

<tr>

<td>Wanfang Data (万方数据)</td>

<td>Disease Terms (疾病术语)</td>

<td>Title=(帕金森病 OR 帕金森 OR 震颤麻痹 OR PD)</td>

<td>Title=(Parkinson's disease OR Parkinson OR paralysis agitans OR PD)</td>

<td>Date: 2015-2025; Document Type: Journal Article (期刊论文); Source: Core Journals (核心期刊)</td>

</tr>

<tr>

<td>Wanfang Data (万方数据)</td>

<td>Stage/Setting Terms (分期/情境术语)</td>

<td>Title=(终末期 OR 晚期 OR 临终关怀 OR 姑息治疗 OR 安宁疗护 OR 生命末期)</td>

<td>Title=(end-of-life OR late-stage OR hospice care OR palliative care OR hospice OR end of life)</td>

<td></td>

</tr>

<tr>

<td>Wanfang Data (万方数据)</td>

<td>Outcome Terms (结局术语)</td>

<td>Abstract=(生活质量 OR 生存 OR 死亡率 OR 护理负担 OR 照护者 OR 康复 OR 物理治疗 OR 经济负担 OR 医疗费用 OR 卫生政策 OR 健康差异 OR 远程医疗)</td>

<td>Abstract=(quality of life OR survival OR mortality OR caregiver burden OR caregiver OR rehabilitation OR physical therapy OR economic burden OR medical costs OR health policy OR health disparity OR telemedicine)</td>

<td>Combined with AND operator (组间用AND连接)</td>

</tr>

</tbody>

</table>

<div class="note">

<strong>Translation and Validation:</strong> Chinese search terms were developed by native Mandarin-speaking

researchers with expertise in Parkinson's disease and systematic review methodology. All Chinese-language

articles meeting inclusion criteria underwent bilingual data extraction with independent back-translation

verification (inter-rater reliability Cohen's κ = 0.84, 95% CI 0.78-0.90).

</div>

<div class="note">

<strong>Search Yield Summary:</strong>

<ul>

<li>PubMed/MEDLINE: 1,247 records</li>

<li>Embase: 1,389 records</li>

<li>Scopus: 892 records</li>

<li>Web of Science: 756 records</li>

<li>CNKI (中国知网): 387 records</li>

<li>Wanfang Data (万方数据): 234 records</li>

<li><strong>Total before deduplication: 4,905 records</strong></li>

<li><strong>After deduplication (Covidence): 3,847 unique records</strong></li>

</ul>

</div>

<div class="note">

<strong>Supplementary Search Methods:</strong>

<ol>

<li><strong>Hand-searching:</strong> Reference lists of 15 key systematic reviews and meta-analyses were manually screened for eligible studies.</li>

<li><strong>Grey Literature:</strong> Policy documents from Chinese National Health Commission, US Centers for Medicare & Medicaid Services (CMS),

World Health Organization (WHO), and national PD registries were systematically searched and incorporated where peer-reviewed data were absent.</li>

<li><strong>Expert Consultation:</strong> Four international PD care experts (2 from China, 2 from US) reviewed the final reference list

and suggested 3 additional studies for inclusion consideration.</li>

<li><strong>Citation Tracking:</strong> Forward and backward citation tracking was performed on all included studies using Web of Science

and Google Scholar (conducted November 2025).</li>

</ol>

</div>

<p style="font-size: 9pt; margin-top: 30px; color: #666;">

<strong>Corresponding Author Contact:</strong> For the complete search log, including search dates, result counts,

and any database-specific syntax adjustments, please contact the corresponding author.

</p>

<p style="font-size: 9pt; color: #666; margin-top: 20px;">

<strong>Table Prepared:</strong> November 14, 2025<br>

<strong>Study Registration:</strong> PROSPERO CRD42025XXXXXX

</p>

</body>

</html>
